# Supplementary material
Source: PubMed Central journal article supplement (PMC3102275)
Supplement: emboj201168s2.pdf [file emboj201168s2.pdf]

Manuscript EMBO-2010-75415

**Central functions of bicarbonate in S-type anion channel activation and OST1 protein kinase in CO<sub>2</sub> signal Transduction in guard cell**

Shaowu Xue, Honghong Hu, Amber Ries, Ebe Merilo, Hannes Kollist and Julian Schroeder

*Corresponding author: Julian Schroeder, University of California*

---

**Review timeline:**

|                     |                  |
|---------------------|------------------|
| Submission date:    | 18 July 2010     |
| Editorial Decision: | 31 August 2010   |
| Revision received:  | 30 November 2010 |
| Editorial Decision: | 17 January 2011  |
| Revision received:  | 11 February 2011 |
| Accepted:           | 16 February 2011 |

---

No Peer Review Process File is available with this article, as the authors have chosen not to make the review process public in this case.
